# Supplementary material for: Effects of biotransport and hydro-meteorological conditions on transport of trace elements in the Scott River (Bellsund, Spitsbergen)
Source: PeerJ. 2021 Jun 28;9:e11477. doi: 10.7717/peerj.11477 (PMC8247700; doi:10.7717/peerj.11477)
Supplement: Supplemental Information 2 [file peerj-09-11477-s002.xls]

## Sheet: Arkusz1
Run	Li	Be	Al	V	Cr	Mn	Co	Ni	Cu	Zn	Ga	As	Se	Sr	Rb	Ag	Cd	Cs	Ba	La	Hg	Tl	Pb	Th	U
	ppb	ppb	ppb	ppb	ppb	ppb	ppb	ppb	ppb	ppb	ppb	ppb	ppb	ppb	ppb	ppb	ppb	ppb	ppb	ppb	ppb	ppb	ppb	ppb	ppb
SRG_1	0.501	0.017	0.599	0.013	0.047	8.454	0.041	0.01	0.022	<0,100	0.029	<0,010	0.15	26.69	0.07	0.012	<0,010	<0,010	2.137	<0,010	<0,100	<0,010	<0,010	0.016	0.027
SRG_2	0.43	<0,010	1.604	0.011	0.01	2.395	0.026	0.015	0.054	<0,100	0.018	<0,010	0.13	19.3	0.069	<0,010	<0,010	<0,010	1.324	<0,010	<0,100	<0,010	<0,010	<0,010	0.05
SRG_3	0.479	<0,010	0.324	0.011	<0,010	0.212	0.05	0.07	<0,010	0.41	0.019	<0,010	0.142	33.75	0.079	<0,010	<0,010	<0,010	1.878	<0,010	<0,100	<0,010	<0,010	<0,010	0.082
SRG_4	0.465	<0,010	1.06	<0,010	<0,010	0.459	0.03	0.037	0.026	<0,100	0.018	<0,010	0.097	24.59	0.076	<0,010	<0,010	<0,010	1.818	<0,010	<0,100	<0,010	<0,010	<0,010	0.033
SRG_5	0.455	<0,010	0.53	0.014	<0,010	4.726	0.027	0.041	0.021	0.109	0.017	<0,010	0.109	22.5	0.061	<0,010	<0,010	<0,010	1.605	<0,010	<0,100	<0,010	<0,010	<0,010	0.043
SRG_6	0.508	<0,010	0.569	0.013	<0,010	10.83	0.04	0.406	0.134	0.38	0.023	<0,010	0.104	27.42	0.085	<0,010	0.091	<0,010	2.28	<0,010	<0,100	<0,010	0.01	<0,010	0.027
SRG_7	0.444	<0,010	0.506	0.013	<0,010	0.966	0.03	0.015	0.024	0.256	0.017	<0,010	0.146	24.21	0.073	<0,010	0.031	<0,010	1.717	<0,010	<0,100	<0,010	<0,010	<0,010	0.027
SRG_8	0.443	<0,010	0.44	0.01	<0,010	0.716	0.033	0.077	<0,010	0.37	0.018	<0,010	0.164	26.11	0.068	<0,010	0.021	<0,010	2.014	<0,010	<0,100	<0,010	<0,010	<0,010	0.04
SRG_9	0.427	<0,010	0.207	<0,010	<0,010	5.331	0.033	0.07	<0,010	0.208	0.018	<0,010	0.119	23.97	0.062	<0,010	0.013	<0,010	1.77	<0,010	<0,100	<0,010	<0,010	<0,010	0.036
SRG_10	0.411	<0,010	3.013	<0,010	<0,010	0.1	0.037	0.06	<0,010	0.215	0.02	<0,010	0.055	25.28	0.079	<0,010	0.011	<0,010	1.851	<0,010	<0,100	<0,010	<0,010	<0,010	0.04
SRG_11	0.431	<0,010	0.35	0.014	<0,010	0.168	0.044	0.201	<0,010	0.532	0.022	<0,010	0.062	30.48	0.074	<0,010	<0,010	<0,010	2.267	<0,010	<0,100	<0,010	<0,010	<0,010	0.049
SRG_12	0.476	<0,010	1.222	<0,010	<0,010	0.017	0.052	0.037	<0,010	0.205	0.026	<0,010	0.073	40.56	0.101	<0,010	<0,010	<0,010	2.753	<0,010	<0,100	<0,010	<0,010	<0,010	0.14
SRG_13	0.405	<0,010	1.353	0.011	0.01	0.076	0.034	0.097	0.196	0.327	0.019	<0,010	0.133	24.47	0.078	<0,010	<0,010	<0,010	1.568	<0,010	<0,100	<0,010	<0,010	<0,010	0.069
SRG_14	0.381	<0,010	0.629	0.01	<0,010	0.02	0.025	0.021	0.012	0.289	0.014	<0,010	0.093	21.27	0.07	<0,010	<0,010	<0,010	1.145	<0,010	<0,100	<0,010	<0,010	<0,010	0.058
SRG_15	0.404	<0,010	0.822	0.016	<0,010	0.078	0.031	0.037	<0,010	0.258	0.017	<0,010	0.095	24.21	0.063	<0,010	0.018	<0,010	1.721	<0,010	<0,100	<0,010	<0,010	<0,010	0.047
SRG_16	0.414	0.015	0.522	0.067	0.038	0.158	0.049	<0,010	0.026	<0,100	0.02	<0,010	0.088	27.66	0.067	<0,010	<0,010	<0,010	1.926	<0,010	<0,100	0.01	<0,010	<0,010	0.248
SRG_17	0.377	<0,010	2.219	0.011	0.016	0.029	0.029	<0,010	0.026	<0,100	0.017	<0,010	0.098	21.51	0.054	<0,010	<0,010	<0,010	1.318	<0,010	<0,100	<0,010	<0,010	<0,010	0.114
SRG_18	0.301	<0,010	5.434	0.017	0.031	0.185	0.042	0.137	0.425	0.603	0.016	<0,010	0.199	14.45	0.244	<0,010	<0,010	<0,010	0.988	<0,010	<0,100	<0,010	<0,010	<0,010	0.071
SRG_19	0.338	<0,010	1.14	<0,010	<0,010	1.305	0.03	0.031	0.022	1.879	0.017	<0,010	0.067	21.71	0.059	<0,010	0.012	<0,010	1.673	<0,010	<0,100	<0,010	<0,010	<0,010	0.034
SRG_20	0.394	<0,010	1.354	<0,010	<0,010	1.705	0.052	0.072	0.028	0.896	0.023	<0,010	0.104	30.61	0.069	<0,010	0.065	<0,010	2.375	<0,010	<0,100	<0,010	0.02	<0,010	0.065
SRG_21	0.372	<0,010	2.849	0.016	<0,010	5.293	0.036	0.031	0.016	0.377	0.016	<0,010	0.126	21.57	0.058	<0,010	0.034	<0,010	1.513	<0,010	<0,100	<0,010	0.01	<0,010	0.056
SRG_22	0.423	<0,010	0.332	<0,010	<0,010	5.528	0.032	0.039	<0,010	0.653	0.016	<0,010	0.15	22.54	0.065	<0,010	0.054	<0,010	1.565	<0,010	<0,100	<0,010	0.011	<0,010	0.054
SRG_23	0.341	<0,010	2.948	0.011	<0,010	5.423	0.036	0.064	0.02	0.56	0.019	<0,010	0.071	22.76	0.055	<0,010	0.03	<0,010	1.706	<0,010	<0,100	<0,010	0.014	<0,010	0.032
SRG_24	0.306	<0,010	2.926	0.013	0.012	0.065	0.022	0.023	<0,010	0.127	0.017	<0,010	0.093	19.24	0.052	<0,010	<0,010	<0,010	1.207	<0,010	<0,100	<0,010	<0,010	<0,010	0.07
SRG_25	0.417	<0,010	2.154	<0,010	<0,010	4.817	0.045	0.01	0.013	0.268	0.016	<0,010	0.097	22.64	0.066	<0,010	0.011	<0,010	1.534	<0,010	<0,100	<0,010	<0,010	<0,010	0.064
SRG_26	0.444	<0,010	2.605	<0,010	0.013	0.042	0.027	0.029	0.032	0.18	0.017	<0,010	0.12	22.52	0.062	<0,010	<0,010	<0,010	1.373	<0,010	<0,100	<0,010	<0,010	<0,010	0.09
SRG_27	0.315	<0,010	0.231	<0,010	<0,010	2.014	0.024	0.033	0.026	0.137	0.014	<0,010	0.084	20.31	0.048	<0,010	<0,010	<0,010	1.479	<0,010	<0,100	<0,010	<0,010	<0,010	0.043
SRG_28	0.253	<0,010	0.65	<0,010	<0,010	0.034	0.011	<0,010	0.013	0.144	<0,010	<0,010	0.099	10.92	0.079	<0,010	<0,010	<0,010	0.29	<0,010	<0,100	<0,010	<0,010	<0,010	0.068
SRG_29	0.254	<0,010	4.804	0.016	0.023	0.056	0.018	0.048	0.021	0.36	0.022	<0,010	0.137	15.39	0.063	<0,010	<0,010	<0,010	1.039	<0,010	<0,100	<0,010	<0,010	<0,010	0.042
SRG_30	0.275	<0,010	1.435	0.011	<0,010	0.063	0.022	0.039	0.013	<0,100	0.018	<0,010	0.122	16.4	0.073	<0,010	<0,010	<0,010	1.136	<0,010	<0,100	<0,010	<0,010	<0,010	0.072
SRG_31	0.356	<0,010	1.573	0.011	<0,010	0.102	0.053	0.056	0.02	0.223	0.028	<0,010	0.055	31.01	0.069	<0,010	<0,010	<0,010	2.68	<0,010	<0,100	<0,010	0.017	<0,010	0.074
SRG_32	0.284	0.013	5.712	0.048	0.027	0.068	0.018	0.025	0.032	<0,100	0.01	<0,010	0.131	10.3	0.055	<0,010	<0,010	<0,010	0.526	<0,010	<0,100	<0,010	<0,010	<0,010	0.224
SRG_33	0.336	<0,010	0.232	0.013	<0,010	8.631	0.045	<0,01	0.017	0.165	0.022	<0,010	0.012	25.66	0.058	<0,010	<0,010	<0,010	2.241	<0,010	<0,100	<0,010	<0,010	<0,010	0.089
SRG_34	0.326	<0,010	0.186	0.011	<0,010	0.765	0.022	<0,01	0.015	<0,100	0.013	<0,010	0.068	17.44	0.054	<0,010	<0,010	<0,010	1.194	<0,010	<0,100	<0,010	<0,010	<0,010	0.048
SRG_35	0.315	<0,010	2.043	<0,010	<0,010	1.224	0.019	<0,01	0.031	<0,100	0.012	<0,010	0.067	16.64	0.06	<0,010	<0,010	<0,010	1.201	<0,010	<0,100	<0,010	<0,010	<0,010	0.028
SRG_36	0.398	<0,010	1.032	0.024	<0,010	0.687	0.033	0.025	0.028	0.314	0.022	<0,010	0.087	26.63	0.063	<0,010	<0,010	<0,010	1.611	<0,010	<0,100	<0,010	<0,010	<0,010	0.1
SRG_37	0.335	<0,010	0.43	<0,010	<0,010	1.759	0.026	<0,01	0.028	<0,100	0.016	<0,010	0.086	23.31	0.05	<0,010	<0,010	<0,010	1.861	<0,010	<0,100	<0,010	<0,010	<0,010	0.047
SRG_38	0.541	<0,010	4.533	0.017	<0,010	17.73	0.057	0.151	0.09	0.324	0.022	<0,010	0.1	28.9	0.077	<0,010	0.01	<0,010	2.23	<0,010	<0,100	<0,010	0.01	<0,010	0.069
SRG_39	0.325	<0,010	3.142	0.01	<0,010	0.751	0.027	0.054	0.029	0.144	0.015	<0,010	0.153	20.69	0.064	<0,010	0.019	<0,010	1.466	<0,010	<0,100	<0,010	<0,010	<0,010	0.035
SRG_40	0.573	<0,010	2.225	0.023	<0,010	5.327	0.034	0.162	0.182	0.172	0.018	<0,010	0.149	28.42	0.087	<0,010	0.018	<0,010	1.95	<0,010	<0,100	<0,010	0.013	<0,010	0.073
SRG_41	0.514	<0,010	0.163	<0,010	<0,010	2.393	0.027	0.118	0.039	0.261	0.016	<0,010	0.098	23.31	0.073	<0,010	0.02	<0,010	1.645	<0,010	<0,100	<0,010	<0,010	<0,010	0.07
SRG_42	0.572	<0,010	1.916	0.014	<0,010	7.508	0.028	0.197	0.092	0.413	0.018	<0,010	0.117	25.98	0.079	<0,010	<0,010	<0,010	1.856	<0,010	<0,100	<0,010	0.011	<0,010	0.077
	Li	Be	Al	V	Cr	Mn	Co	Ni	Cu	Zn	Ga	As	Se	Sr	Rb	Ag	Cd	Cs	Ba	La	Hg	Tl	Pb	Th	U
SRM_01	0.578	<0,010	0.413	0.019	0.034	0.677	0.02	0.204	0.038	<0,100	0.017	0.045	0.161	21.43	0.072	<0,010	<0,010	<0,010	1.202	<0,010	<0,10	<0,010	<0,010	0.011	0.035
SRM_02	0.525	<0,010	0.732	<0,010	0.024	12.03	0.032	0.176	0.041	0.101	0.021	0.032	0.133	22.43	0.07	<0,010	<0,010	<0,010	1.884	<0,010	<0,10	<0,010	<0,010	<0,010	0.045
SRM_03	0.542	<0,010	0.386	<0,010	0.016	0.242	0.043	0.145	0.023	0.29	0.022	0.038	0.126	28.56	0.088	<0,010	<0,010	<0,010	1.814	<0,010	<0,10	<0,010	<0,010	<0,010	0.084
SRM_04	0.365	<0,010	0.393	<0,010	0.011	3.278	0.017	0.034	0.026	<0,100	0.012	0.019	0.09	20.57	0.065	<0,010	<0,010	<0,010	1.075	<0,010	<0,10	<0,010	<0,010	<0,010	0.022
SRM_05	0.644	<0,010	0.2	0.013	<0,010	4.112	0.026	0.098	0.036	<0,100	0.017	0.057	0.188	25.15	0.075	<0,010	<0,010	<0,010	1.711	<0,010	<0,10	<0,010	<0,010	<0,010	0.06
SRM_06	0.349	<0,010	0.198	<0,010	0.012	3.374	0.023	0.055	0.078	<0,100	0.017	<0,010	0.077	20.16	0.058	<0,010	<0,010	<0,010	1.556	<0,010	<0,10	<0,010	<0,010	<0,010	0.026
SRM_07	0.484	<0,010	0.709	<0,010	<0,010	1.357	0.026	0.096	0.026	<0,100	0.018	0.013	0.086	21.53	0.076	<0,010	<0,010	<0,010	1.676	<0,010	<0,10	<0,010	<0,010	<0,010	0.036
SRM_08	0.465	<0,010	0.476	0.019	<0,010	0.269	0.025	0.151	0.02	0.253	0.016	<0,010	0.088	20.96	0.07	<0,010	<0,010	<0,010	1.581	<0,010	<0,10	<0,010	<0,010	<0,010	0.039
SRM_09	0.464	<0,010	0.257	<0,010	<0,010	6.761	0.031	0.072	0.02	<0,100	0.018	<0,010	0.058	22.95	0.065	<0,010	<0,010	<0,010	1.829	<0,010	<0,10	<0,010	<0,010	<0,010	0.034
SRM_10	0.381	<0,010	1.386	<0,010	<0,010	0.197	0.024	0.023	0.028	<0,100	0.018	0.013	0.086	17.04	0.062	<0,010	<0,010	<0,010	1.028	<0,010	<0,10	<0,010	<0,010	<0,010	0.068
SRM_11	0.395	<0,010	0.416	<0,010	<0,010	0.168	0.023	0.038	0.018	<0,100	0.021	0.013	0.111	16.74	0.07	<0,010	<0,010	<0,010	1.155	<0,010	<0,10	<0,010	<0,010	<0,010	0.032
SRM_12	0.514	<0,010	1.944	<0,010	<0,010	0.082	0.051	0.074	0.016	0.196	0.027	0.013	0.069	36.2	0.093	<0,010	<0,010	<0,010	2.486	<0,010	<0,10	<0,010	0.01	<0,010	0.134
SRM_13	0.371	<0,010	0.784	<0,010	<0,010	0.099	0.017	0.032	0.025	<0,100	0.017	<0,010	0.156	13.12	0.077	<0,010	<0,010	<0,010	0.524	<0,010	<0,10	<0,010	<0,010	<0,010	0.071
SRM_14	0.392	<0,010	3.008	<0,010	0.013	1.456	0.014	0.019	0.029	<0,100	0.011	0.025	0.088	11.58	0.078	<0,010	<0,010	<0,010	0.681	<0,010	<0,10	<0,010	<0,010	<0,010	0.031
SRM_15	0.449	<0,010	1.038	0.02	0.047	3.646	0.054	0.113	0.051	<0,100	0.017	0.045	0.128	22.35	0.083	<0,010	<0,010	<0,010	1.691	<0,010	<0,10	0.013	<0,010	<0,010	0.108
SRM_16	0.442	<0,010	0.363	0.011	<0,010	0.475	0.036	0.206	0.017	<0,100	0.018	0.057	0.105	24.16	0.066	<0,010	<0,010	<0,010	1.887	<0,010	<0,10	<0,010	<0,010	<0,010	0.056
SRM_17	0.454	<0,010	0.313	<0,010	<0,010	0.422	0.032	0.1	0.067	<0,100	0.02	0.083	0.156	21.86	0.072	<0,010	<0,010	<0,010	1.895	<0,010	<0,10	<0,010	<0,010	<0,010	0.05
SRM_18	0.282	<0,010	3.52	<0,010	0.011	0.115	0.019	0.015	0.027	<0,100	0.015	0.013	0.12	15.24	0.087	<0,010	<0,010	<0,010	0.898	<0,010	<0,10	<0,010	<0,010	<0,010	0.049
SRM_19	0.354	<0,010	0.499	0.011	0.013	0.393	0.024	0.081	0.101	<0,100	0.012	0.025	0.09	17.23	0.061	<0,010	<0,010	<0,010	1.185	<0,010	<0,10	<0,010	<0,010	<0,010	0.029
SRM_20	0.531	<0,010	1.37	0.02	0.011	3.436	0.06	0.334	0.022	0.374	0.023	0.051	0.092	31.21	0.098	<0,010	<0,010	<0,010	2.221	<0,010	<0,10	<0,010	0.02	<0,010	0.056
SRM_21	0.364	<0,010	0.202	<0,010	<0,010	0.09	0.017	0.032	0.02	<0,100	0.012	0.013	0.146	15.97	0.061	<0,010	<0,010	<0,010	0.99	<0,010	<0,10	<0,010	<0,010	<0,010	0.045
SRM_22	0.414	<0,010	0.249	<0,010	<0,010	2.54	0.02	0.011	0.031	<0,100	0.014	0.025	0.115	18.83	0.06	<0,010	<0,010	<0,010	1.314	<0,010	<0,10	<0,010	<0,010	<0,010	0.059
SRM_23	0.38	<0,010	0.624	0.013	<0,010	6.228	0.028	0.104	0.019	0.152	0.015	0.025	0.09	20.03	0.064	<0,010	<0,010	<0,010	1.573	<0,010	<0,10	<0,010	<0,010	<0,010	0.03
SRM_24	0.359	<0,010	0.642	<0,010	<0,010	6.154	0.036	0.032	0.029	<0,100	0.016	0.019	0.135	20.02	0.054	<0,010	<0,010	<0,010	1.503	<0,010	<0,10	<0,010	<0,010	<0,010	0.049
SRM_25	0.414	<0,010	0.312	<0,010	<0,010	1.334	0.016	0.013	0.039	<0,100	0.011	0.019	0.1	14.72	0.069	<0,010	<0,010	<0,010	0.871	<0,010	<0,10	<0,010	<0,010	<0,010	0.056
SRM_26	0.446	<0,010	5.714	<0,010	<0,010	6.524	0.033	0.119	0.036	0.207	0.018	0.096	0.145	21.73	0.066	<0,010	<0,010	<0,010	1.623	<0,010	<0,10	<0,010	0.02	<0,010	0.057
SRM_27	0.351	<0,010	0.442	<0,010	<0,010	1.878	0.018	0.019	0.038	<0,100	0.011	0.045	0.09	14.76	0.053	<0,010	<0,010	<0,010	0.994	<0,010	<0,10	<0,010	0.013	<0,010	0.042
SRM_28	0.466	<0,010	0.296	<0,010	<0,010	0.179	0.046	0.206	0.025	0.618	0.019	0.025	0.13	29.4	0.112	<0,010	<0,010	<0,010	1.996	<0,010	<0,10	<0,010	0.052	<0,010	0.121
SRM_29	0.193	<0,010	3.243	0.03	0.015	0.252	0.01	0.09	0.024	<0,100	0.014	0.019	0.135	17.83	0.071	<0,010	<0,010	<0,010	0.945	<0,010	<0,10	<0,010	<0,010	<0,010	0.032
SRM_30	0.467	<0,010	0.526	<0,010	0.01	0.09	0.044	0.047	0.021	0.397	0.024	0.013	0.154	29.48	0.119	<0,010	<0,010	<0,010	2.287	<0,010	<0,10	<0,010	0.03	<0,010	0.133
SRM_31	0.5	0.012	0.253	0.028	0.034	0.082	0.035	0.1	0.026	<0,100	0.016	0.051	0.154	21.81	0.11	<0,010	<0,010	<0,010	1.565	<0,010	<0,10	0.011	<0,010	<0,010	0.11
SRM_32	0.401	<0,010	1.046	0.022	<0,010	2.536	0.024	0.096	0.028	<0,100	0.013	0.038	0.148	15.16	0.069	<0,010	<0,010	<0,010	1.157	<0,010	<0,10	<0,010	<0,010	<0,010	0.037
SRM_33	0.316	<0,010	0.783	<0,010	<0,010	2.15	0.02	0.015	0.014	<0,100	0.012	0.013	0.064	14.82	0.062	<0,010	<0,010	<0,010	1.16	<0,010	<0,10	<0,010	<0,010	<0,010	0.031
SRM_34	0.494	<0,010	0.124	<0,010	<0,010	0.323	0.034	0.176	0.026	0.736	0.021	0.038	0.15	25.78	0.076	<0,010	<0,010	<0,010	1.979	<0,010	<0,10	<0,010	<0,010	<0,010	0.048
SRM_35	0.36	<0,010	0.335	0.019	<0,010	2.481	0.026	0.017	0.023	0.127	0.017	0.019	0.086	21.81	0.062	<0,010	<0,010	<0,010	1.767	<0,010	<0,10	<0,010	<0,010	<0,010	0.035
SRM_36	0.355	<0,010	0.9	0.019	<0,010	6.161	0.031	0.036	0.024	0.141	0.017	0.045	0.062	20.77	0.066	<0,010	<0,010	<0,010	1.712	<0,010	<0,10	<0,010	<0,010	<0,010	0.031
SRM_37	0.463	<0,010	0.369	<0,010	<0,010	0.393	0.036	0.079	0.033	0.201	0.018	0.032	0.162	25.73	0.074	<0,010	<0,010	<0,010	2.082	<0,010	<0,10	<0,010	<0,010	<0,010	0.064
SRM_38	0.612	<0,010	0.358	<0,010	<0,010	0.319	0.029	0.017	0.033	0.124	0.016	0.032	0.146	27.27	0.078	<0,010	<0,010	<0,010	1.805	<0,010	<0,10	<0,010	<0,010	<0,010	0.069
SRM_39	0.44	<0,010	0.28	0.019	<0,010	0.137	0.028	0.079	0.024	0.155	0.014	0.038	0.124	25.37	0.067	<0,010	<0,010	<0,010	1.366	<0,010	<0,10	<0,010	0.01	<0,010	0.077
SRM_40	0.633	<0,010	1.909	0.024	0.031	0.128	0.039	0.247	0.101	0.708	0.023	0.076	0.169	31.1	0.144	<0,010	<0,010	<0,010	1.99	<0,010	<0,10	<0,010	0.01	<0,010	0.127
SRM_41	0.544	<0,010	0.389	0.016	<0,010	1.212	0.025	0.053	0.031	<0,100	0.016	0.051	0.109	23.43	0.075	<0,010	<0,010	<0,010	1.722	<0,010	<0,10	<0,010	<0,010	<0,010	0.078
SRM_42	0.675	<0,010	0.259	<0,010	<0,010	3.761	0.035	0.204	0.04	0.213	0.017	0.121	0.19	24.94	0.083	<0,010	<0,010	<0,010	1.713	<0,010	<0,10	<0,010	<0,010	<0,010	0.092
